# Supplementary material for: Highly conductive and environmentally stable gold/graphene yarns for flexible and wearable electronics
Source: Royal Society of Chemistry journal article supplement (doi:10.1039/c7nr04384h), 2017-01-01
Supplement: c7nr04384h1.pdf [file c7nr04384h1.pdf]

## Supporting information

# Highly conductive and environmentally stable gold/graphene yarns for flexible and wearable electronics

*Yong Ju Yun,<sup>\*,†</sup> Chil Seong Ah,<sup>‡</sup> Won G. Hong,<sup>‡</sup> Hae Jin Kim,<sup>‡</sup> Jong-Ho Shin,<sup>⊥</sup> and Yongseok Jun<sup>\*,†</sup>*

*<sup>†</sup>Department of Energy Engineering, Konkuk University, Seoul, 05029, Republic of Korea.*

*<sup>‡</sup>Electronics and Telecommunications Research Institute, Daejeon, 34129, Republic of Korea.*

*<sup>‡</sup>Division of Electron Microscopy Research, Korea Basic Science Institute (KBSI), Daejeon, 34133, Republic of Korea.*

*<sup>⊥</sup>Department of Civil Engineering, Konkuk University, Seoul, 05029, Republic of Korea.*

*\*E-mail: yjyun@konkuk.ac.kr*

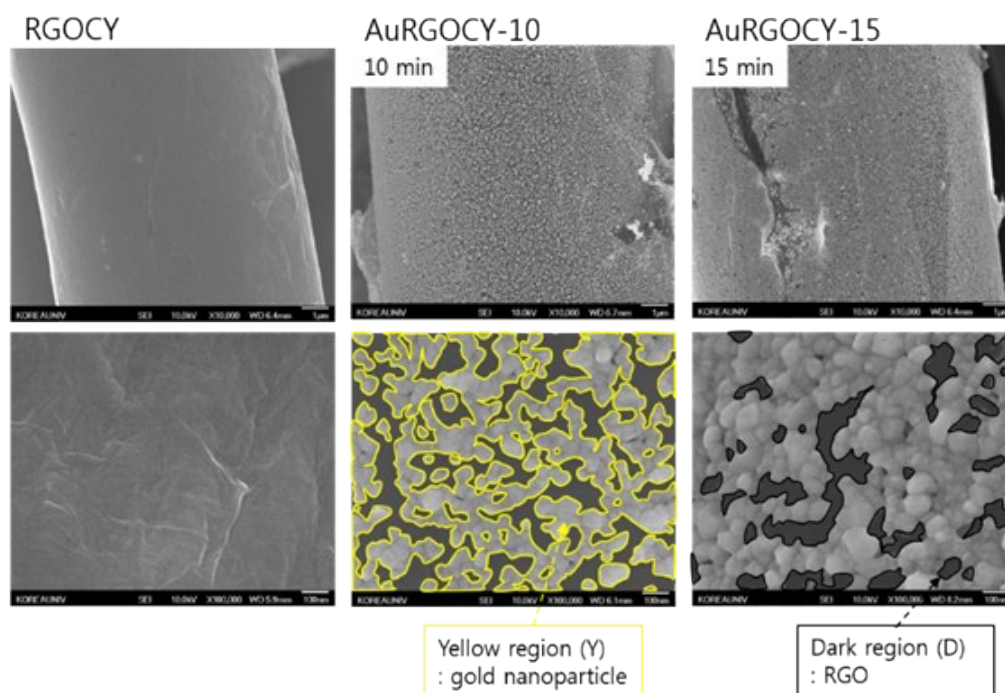

| Samples    | T                       | Y                              | D                              | Surface coverage (%) |
|------------|-------------------------|--------------------------------|--------------------------------|----------------------|
| RGOCY      | 1175000 nm <sup>2</sup> | 0                              | 1175000 nm <sup>2</sup>        | 0 %                  |
| AuRGOCY-10 |                         | 705000 ± 70500 nm <sup>2</sup> | 470000 ± 70500 nm <sup>2</sup> | 60 ± 6 %             |
| AuRGOCY-15 |                         | 998750 ± 47000 nm <sup>2</sup> | 176250 ± 47000 nm <sup>2</sup> | 85 ± 4 %             |

Surface coverage of gold nanoparticle on RGO (%) =  $[(T - D) / T] * 100$  (%)

T (Total area) = 1175000 nm<sup>2</sup>

Y (yellow region: gold nanoparticle)

D (dark region: RGO) = T - Y

**Figure S1.** Surface coverage analysis of gold nanoparticle for RGOCY, 10, and AuRGOCY-15.

AuRGOCY-

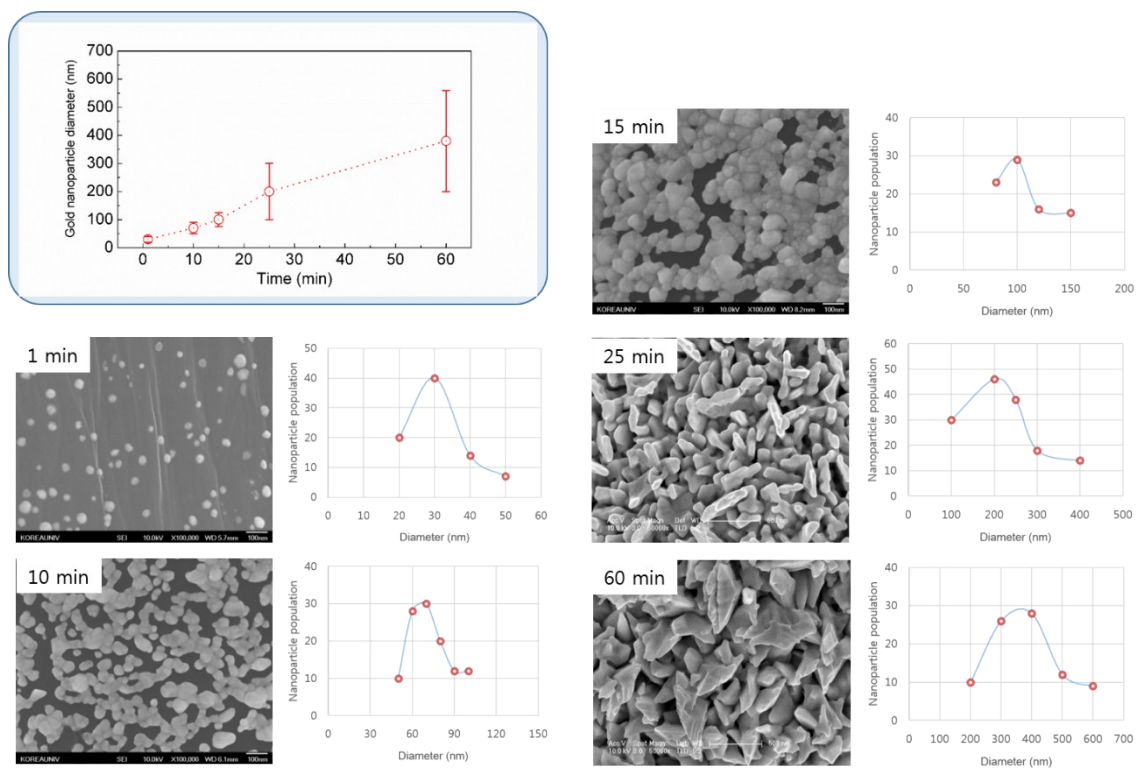

**Figure S2.** Average diameter of gold nanoparticles as a function of deposition time.

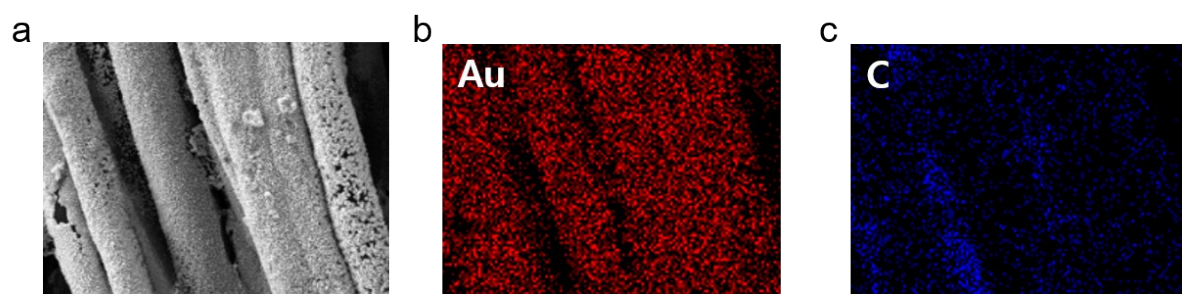

**Figure S3.** a, b, c, FESEM image and EDS spectra of the AuRGOCY-60.

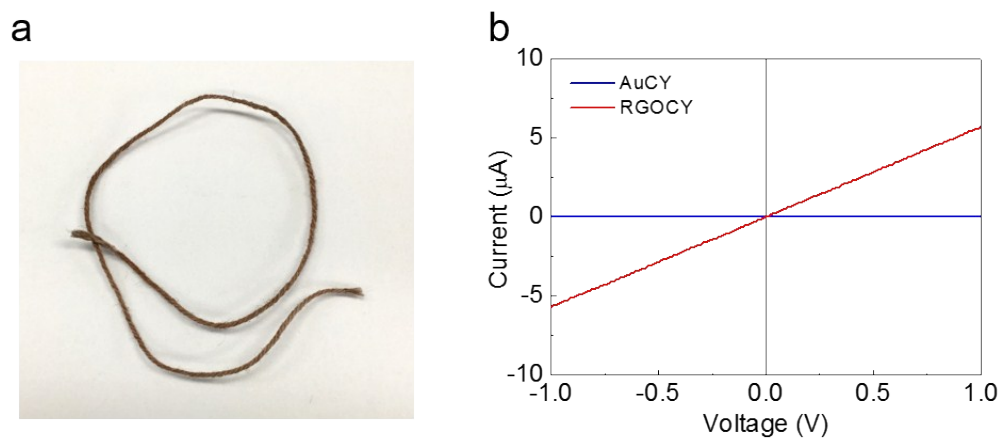

**Figure S4.** a, Photoimage of AuCY. b, I-V curves of AuCY and RGOCY measured by four-probe method.

RGOCY

Current pathway: RGO layer

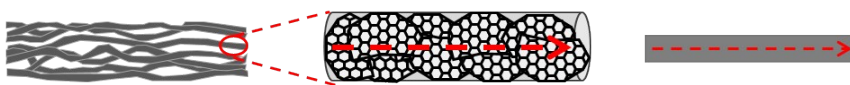

AuRGOCY

Current pathway: Gold layer

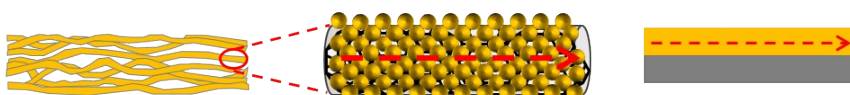

**Figure S5.** Current pathways in RGOCY and AuRGOCY-60.

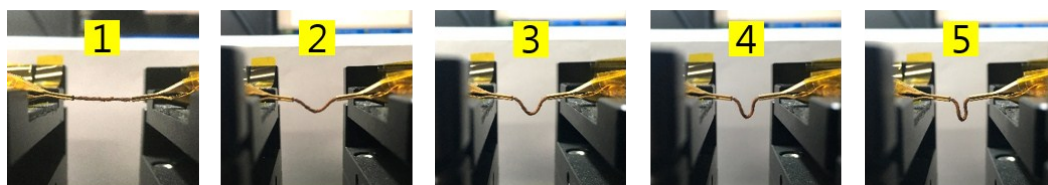

| Position | Bending angles ( $\theta$ ) |
|----------|-----------------------------|
| 1        | 0°                          |
| 2        | 80°                         |
| 3        | 120°                        |
| 4        | 145°                        |
| 5        | 170°                        |

**Figure S6.** Photoimages of gold/graphene yarns during bending test.

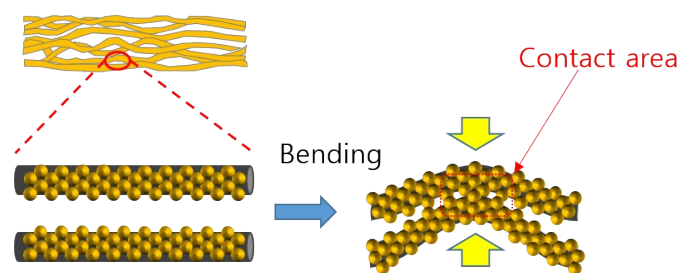

**Figure S7.** Schematic illustration of the AuRGOCY under bending process.



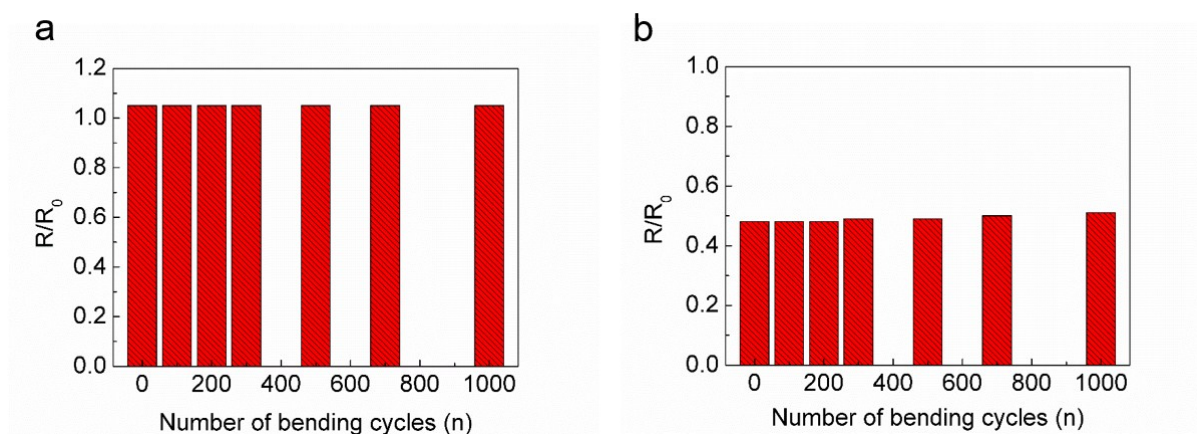

**Figure S8.** a, b, Mechanical durability test results of RGOCY and AuRGOCY-60 under repeated bending-releasing (1000 cycles).

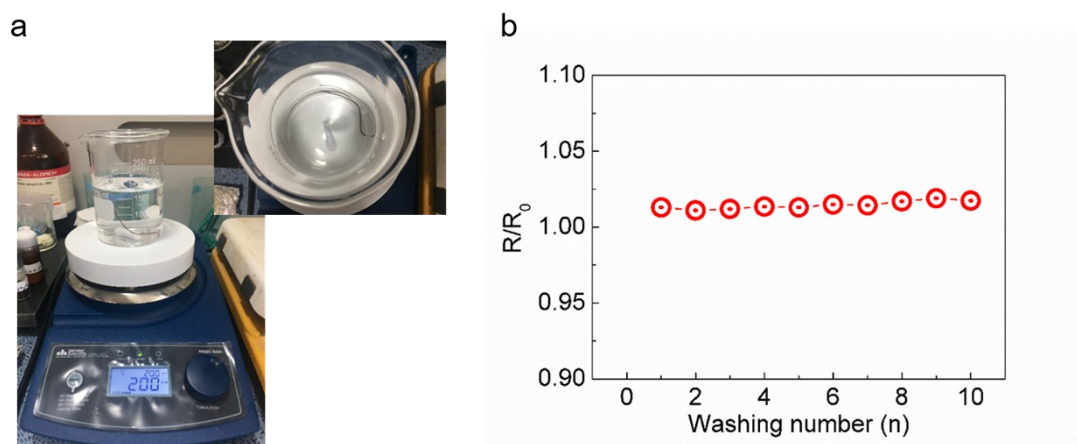

**Figure S9.** a, Photoimage of gold/graphene yarn during washing test. b, Variation of electrical resistance as a function of washing number.

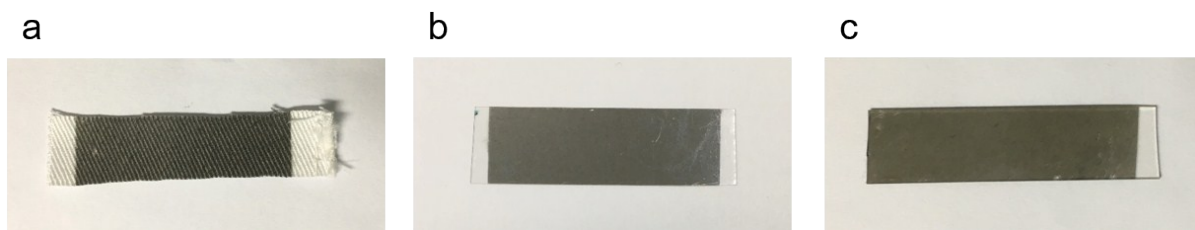

**Figure S10.** Photoimages of various RGO soft substrates. a, RGO/cotton fabric. b, RGO/PET film. c, RGO/PDMS.

**Table S1.** Sheet resistance of various graphene films and gold/graphene films.

| Samples                | Sheet resistance ( $\Omega/\text{sq}$ ) |
|------------------------|-----------------------------------------|
| RGO cotton fabric      | $2500 \pm 700$                          |
| Gold/RGO cotton fabric | $1.0 \pm 5.0$                           |
| RGO PET film           | $800 \pm 300$                           |
| Gold/RGO PET film      | $0.15 \pm 0.05$                         |
| RGO PDMS film          | $1000 \pm 500$                          |
| Gold/RGO PDMS film     | $0.35 \pm 0.1$                          |
